# Supplementary material
Source: Springer Nature journal article supplement (https://www.springermedizin.de/resource/supplementary/12889_2009_2019_MOESM5_ESM.pdf/9484318)
Supplement: MOESM5 [file 9484318]

*(You are 50 years old...)*

Your risk of having a heart attack or stroke within the next 5 years is **16%**

This is the same risk as an average person who is **67 years old!**
